# Supplementary material for: In situ growth of a thermoresponsive polymer from a genetically engineered elastin-like polypeptide
Source: Royal Society of Chemistry journal article supplement (doi:10.1039/c1py00074h), 2011-01-01
Supplement: c1py00074h.pdf [file c1py00074h.pdf]

## Supplementary Information

### Nuclear magnetic resonance (NMR) spectroscopy

<sup>1</sup>H and <sup>13</sup>C NMR measurements were performed on a Varian INOVA - 400 MHz multinuclear NMR at 25 °C. All samples were dissolved in deuterated water for NMR measurements.

### Sodium dodecyl sulfate polyacrylamide gel electrophoresis (SDS-PAGE)

SDS-PAGE was carried out using a Bio-Rad Ready Gel® Precast Gel System. Samples were prepared at 1 mg/ml concentration in Tris buffer containing bromophenol blue and run on a precast Tris-HCl gradient gel (4-20%) under denaturing conditions (voltage 200 V, 500 mA, 90 min).

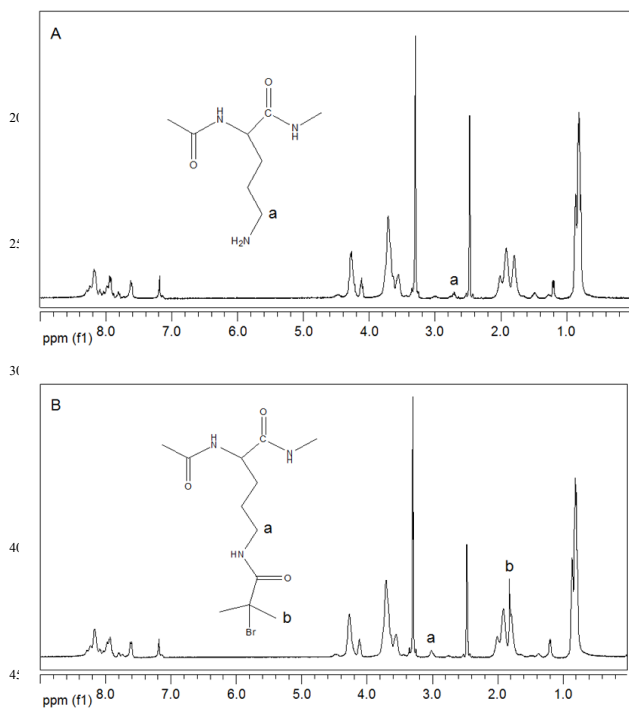

**Figure S1.** <sup>1</sup>H NMR spectra of tELP (A), tELP-g-Br (B).

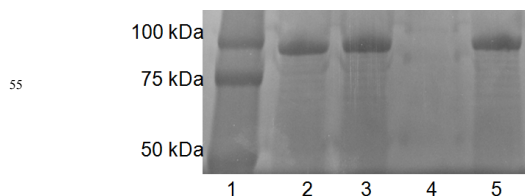

**Figure S2.** SDS-PAGE analysis of ATRP from tELP-g-Br. Lane 1: protein marker; Lane 2: tELP; Lane 3: tELP-g-Br; Lane 4: tELP-g-poly(OEGMA); Lane 5: ATRP from tELP.

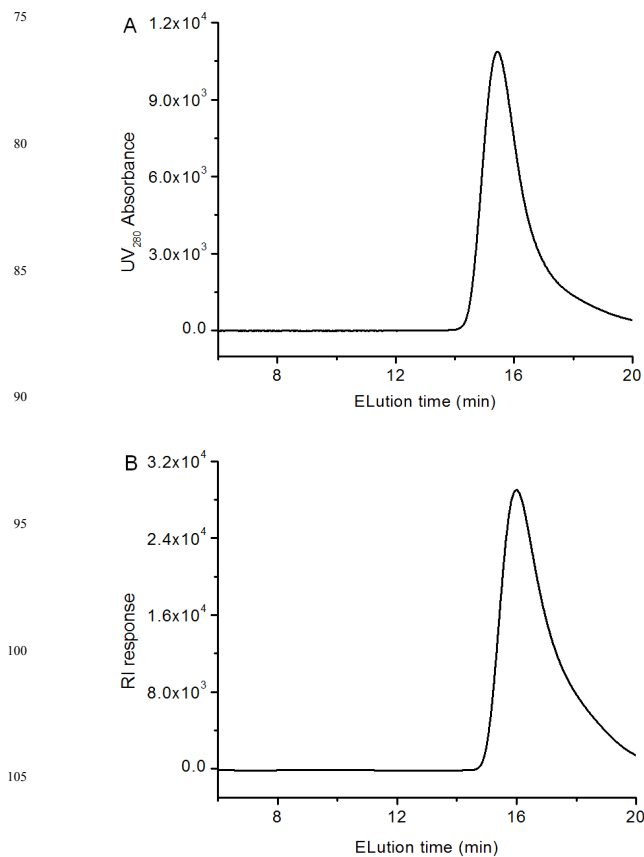

**Figure S3.** SEC analysis after 60 min ATRP using unmodified tELP as a macroinitiator (negative control). (A) UV traces at the absorbance of 280 nm; (B) RI traces.

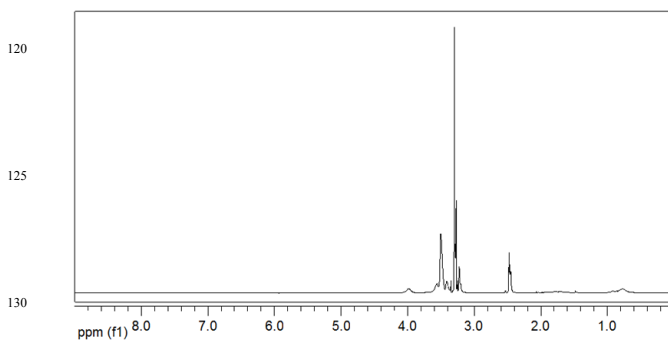

**Figure S4.** <sup>1</sup>H NMR spectrum of tELP-g-poly(OEGMA).

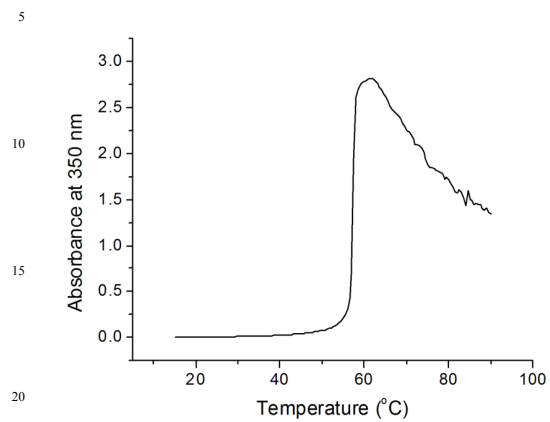

**Figure S5.** Turbidity profile of poly(OEGMA) as a function of temperature.

25

30
